# Supplementary material
Source: Springer Nature journal article supplement (https://www.springermedizin.de/resource/supplementary/12905_2014_454_MOESM1_ESM.pdf/9518852)
Supplement: MOESM1 [file 9518852]

## महिला द्वारा घर पर मूल्यांकन हेतु चैकलिस्ट

## पेशाब की जाँच कैसे करें?

चिकित्सक पर जोशी लेने की तारीख \_\_\_\_\_

## घर पर प्रेग्नेन्सी टेस्ट करने के निर्देश

1. इस आपको क्या-क्या दे रहे हैं-

- प्लस्टिक का फिलार
- पेशाब जाँच की पट्टी
- ड्रॉपर

2. \_\_\_\_\_ तारीख/वार को आपको पेशाब की जाँच करनी है।

3. पेशाब की जाँच कैसे करनी है-

- पेशाब की जाँच नर्भरमापन करवाने के बाद 12 से 14 दिन के बाद करनी है।
- इसके लिए प्लस्टिक के फिलार में लोहा सा पेशाब लें।
- ड्रॉपर के एक सिरे को पेशाब में डालें व ऊपरी सिरे को दबायें। इससे लोहा सा पेशाब ड्रॉपर में आ जायेगा।
- पेशाब जाँच की पट्टी को खोलें व उसमें दिये गये मोल भाग में पेशाब की 5-5 बूँदें डालें।
- 10 से 20 मिनट तक इंतजार करें।

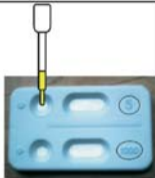

## परिणाम

1. यदि रक्त रंग की 2 या 3 लाइनें आती हैं तो इसका अर्थ है कि आपको नर्भरमापन पूर्ण हो गया है।

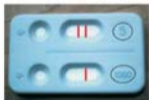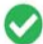

नर्भरमापन पूर्ण हो गया है

2. यदि रक्त रंग की 4 लाइनें आती हैं, तो शायद आपको नर्भरमापन पूर्ण नहीं हुआ है और आपको तुरंत स्वास्थ्य सेवाज आने की आवश्यकता है।

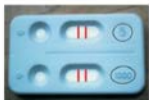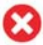

नर्भरमापन पूर्ण नहीं हुआ है, स्वास्थ्य सेवाज घर आये।

3. यदि हल्की लाइनें भी हैं तो भी इसे लाइन माना जायेगा। अर्थात् यदि 3 महरी लाइनें हैं और 1 हल्की लाइन है तो भी दूसरे बार लाइनें ही आनी जायेगी और चिकित्सक पर वापस आये।

चिकित्सक पर जोशी लेने की तारीख \_\_\_\_\_

## साथ आपसे चिन्ता में तो कोई लक्षण है-

यदि आपको घर जाने के बाद निम्नलिखित में से कोई भी समस्या हो तो इसके सिरे आपसे 12-13 दिन तक इंतजार करने की जरूरत नहीं है। आप स्वास्थ्य सेवाज घर तुरंत आएं-

1. क्या आपको बहुत अधिक सूख जा रहा है?  
(रक्त घटे में 2-3 घंटे से ज्यादा भरण)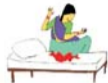

हाँ नहीं

2. क्या आपको (नोटिचॉल लेने के 8 घंटे बाद भी) बुखार आया या 38.5 भी है?

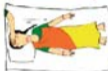

हाँ नहीं

3. घंटे में अत्यधिक तेज दर्द है?

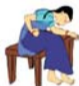

हाँ नहीं

4. क्या आपको अत्यधिक कमजोरी है?

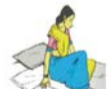

हाँ नहीं

5. क्या आपको पेशाब की जाँच घर घर लाइन (जोली लेने के 14 दिन बाद) आई?

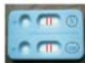

हाँ नहीं

इनमें से कोई भी लक्षण होने पर तुरंत अस्पताल जायें।

यदि उपरोक्त में से कोई भी समस्या है तो तुरंत स्वास्थ्य सेवाज घर सम्पर्क करें।

Clinics' Contact Information
